# Supplementary material
Source: Springer Nature journal article supplement (https://www.springermedizin.de/resource/supplementary/12936_2004_94_MOESM2_ESM.pdf/9546856)

# pORFES

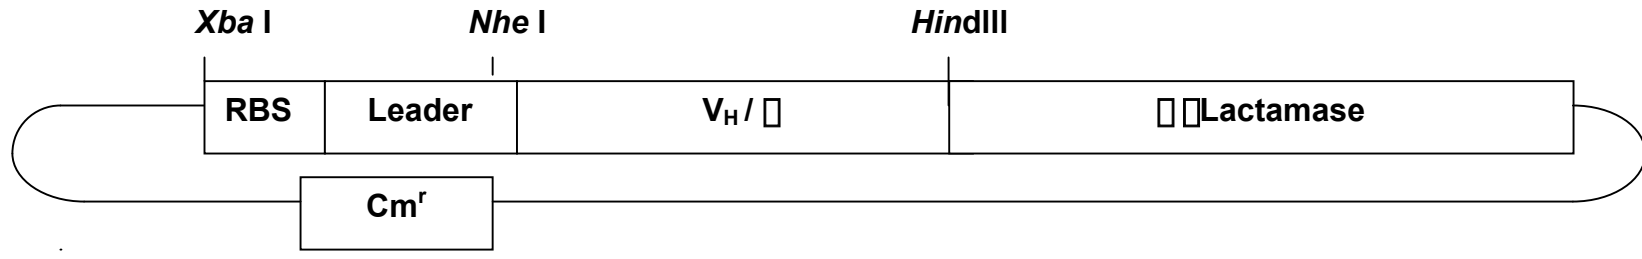

# JC-M13-88

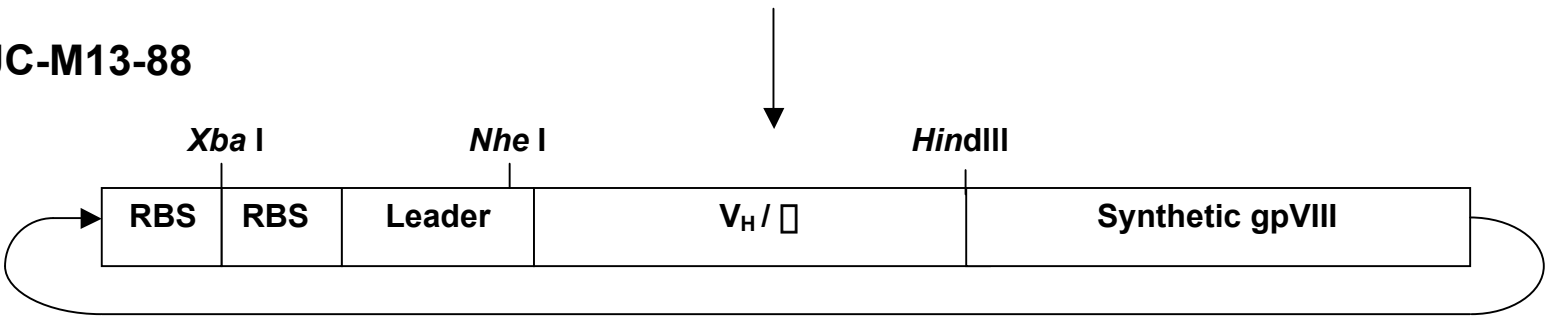

# pAbHIS

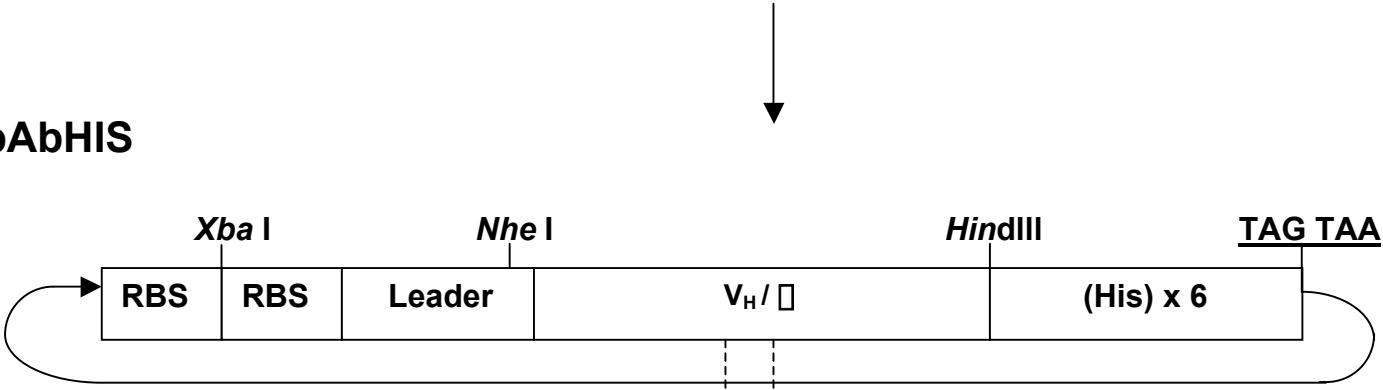

\*V<sub>H</sub> – ASTKGPSVFPLAPSSILAA (H)<sub>6</sub> MA -- □

Supplement: MOESM2 [file 9546856]
